# Supplementary material for: Intensive photochemical oxidation in the marine atmosphere: Evidence from direct radical measurements
Source: Copernicus journal article supplement (doi:10.5194/egusphere-2023-550), 2023-06-19
Supplement: Supplementary file 2 [file egusphere-2023-550-supplement.pdf]

# Supplements

## Tables in supplementary material

**Table.S1.** Detailed information of supporting measurements.

| Species                  | Methods          | limit of detection                | Accuracy (1 $\sigma$ ) | Time resolution |
|--------------------------|------------------|-----------------------------------|------------------------|-----------------|
| <b>OH</b>                | LIF <sup>a</sup> | $3.3 \times 10^5 \text{ cm}^{-3}$ | $\pm 13 \%$            | 60 s            |
| <b>HO<sub>2</sub></b>    | LIF <sup>a</sup> | $1.1 \times 10^6 \text{ cm}^{-3}$ | $\pm 17 \%$            | 60 s            |
| <b>Temperature</b>       | Met One 083E     | -50 to 50 °C                      | $\pm 0.5 \%$           | 60 s            |
| <b>Relative humidity</b> | Met One 083E     | 0–100 %                           | $\pm 2.0 \%$           | 60 s            |
| <b>WS</b>                | Met One 014A     | 0.45–60 m/s                       | $\pm 0.11 \text{ m/s}$ | 1 min           |
| <b>WD</b>                | Met One 024A     | 0–360° (>0.45 m/s)                | $\pm 5^\circ$          | 1 min           |
| <b>Pressure</b>          | Met One 092      | 600–1100 hPa                      | $\pm 0.5 \%$           | 60 s            |
| <b>J-values</b>          | SR               | -                                 | $\pm 10 \%$            | 60 s            |
| <b>PM<sub>2.5</sub></b>  | TEOM             | 0.1 $\mu\text{g}/\text{m}^3$      | $\pm 10 \%$            | 1 h             |
| <b>O<sub>3</sub></b>     | UV               | 0.5 ppb                           | $\pm 10 \%$            | 60 s            |
| <b>NO</b>                | CL               | 0.5 ppb                           | $\pm 10 \%$            | 60 s            |
| <b>NO<sub>2</sub></b>    | CL               | 1 ppb                             | $\pm 10 \%$            | 60 s            |
| <b>SO<sub>2</sub></b>    | UV-F             | 0.3 ppb                           | $\pm 10 \%$            | 60 s            |
| <b>CO</b>                | NDIR             | 50 ppb                            | $\pm 10 \%$            | 60 s            |
| <b>HONO</b>              | LOPAP            | 150 ppt                           | $\pm 15 \%$            | 60 s            |
| <b>HCHO</b>              | Hantzsch         | 200 ppt                           | $\pm 5 \%$             | 60 s            |
| <b>NMHCs</b>             | GC-MS/FID        | 5–70 ppt                          | $\pm 10\text{--}15 \%$ | 1 h             |

**Table.S2.** Photolysis frequencies for Br-related species (Atkinson et al., 2007; Bloss et al., 2010).

| Reaction                | Quantum Yield                                                               | Mean $j(x) / j(\text{NO}_2)$ | References              |
|-------------------------|-----------------------------------------------------------------------------|------------------------------|-------------------------|
| $\text{Br}_2 + h\nu$    |                                                                             | 3.45                         | (Atkinson et al., 2007) |
| $\text{BrO} + h\nu$     |                                                                             | 5.41                         | (Atkinson et al., 2007) |
| $\text{BrONO}_2 + h\nu$ | $\varphi(\text{Br} + \text{NO}_3)=1$                                        | 0.16                         | (Atkinson et al., 2007) |
| $\text{BrONO} + h\nu$   | $\varphi(\text{Br} + \text{NO}_2)=0.5, \varphi(\text{BrO} + \text{NO})=0.5$ | 2.28                         | (Atkinson et al., 2007) |
| $\text{HOBr} + h\nu$    |                                                                             | 0.256                        | (Atkinson et al., 2007) |

**Table.S3.** Gas-phase kinetics for Br-related species in RACM2 mechanism. Revised by (Bloss et al., 2010).

| Reaction                                                                       | Reaction rate constant ( $\text{cm}^3\text{s}^{-1}$ )                                                            | References                  |
|--------------------------------------------------------------------------------|------------------------------------------------------------------------------------------------------------------|-----------------------------|
| $\text{Br} + \text{O}_3 \rightarrow \text{BrO} + \text{O}_2$                   | $1.7 \times 10^{-11} \exp(-800/T)$                                                                               | (Atkinson et al., 2007)     |
| $\text{Br} + \text{HO}_2 \rightarrow \text{HBr} + \text{O}_2$                  | $7.7 \times 10^{-12} \exp(-450/T)$                                                                               | (Atkinson et al., 2007)     |
| $\text{HBr} + \text{OH} \rightarrow \text{Br} + \text{H}_2\text{O}$            | $6.7 \times 10^{-12} \exp(155/T)$                                                                                | (Atkinson et al., 2007)     |
| $\text{Br}_2 + \text{OH} \rightarrow \text{HOBr} + \text{Br}$                  | $2.0 \times 10^{-11} \exp(240/T)$                                                                                | (Atkinson et al., 2007)     |
| $\text{Br} + \text{HCHO} \rightarrow \text{HBr} + \text{HCO}$                  | $7.7 \times 10^{-12} \exp(-580/T)$                                                                               | (Atkinson et al., 2007)     |
| $\text{Br} + \text{ACD} \rightarrow \text{HBr} + \text{ACO}_3$                 | $1.8 \times 10^{-11} \exp(-460/T)$                                                                               | (Atkinson et al., 2007)     |
| $\text{Br} + \text{NO}_2 \rightarrow \text{BrONO}$                             | $k_0 = 4.2 \times 10^{-31} \exp(T/300)^{-2.4}$<br>$k_\infty = 2.7 \times 10^{-11}, F_c = 0.6$                    | (Bloss et al., 2010)        |
| $\text{BrO} + \text{BrO} \rightarrow \text{Br} + \text{Br} + \text{O}_2$       | $2.7 \times 10^{-12}$                                                                                            | (Atkinson et al., 2007)     |
| $\text{BrO} + \text{BrO} \rightarrow \text{Br}_2 + \text{O}_2$                 | $2.9 \times 10^{-14} \exp(840/T)$                                                                                | (Atkinson et al., 2007)     |
| $\text{BrO} + \text{HO}_2 \rightarrow \text{HOBr} + \text{O}_2$                | $4.5 \times 10^{-12} \exp(500/T)$                                                                                | (Atkinson et al., 2007)     |
| $\text{HO} + \text{HOBr} \rightarrow \text{BrO} + \text{H}_2\text{O}$          | $5.0 \times 10^{-11}$                                                                                            | (Bloss et al., 2010)        |
| $\text{BrO} + \text{MO}_2 \rightarrow \text{HOBr} + \text{HO}_2 + \text{HCHO}$ | $4.6 \times 10^{-13} \exp(798/T)$                                                                                | (Enami et al., 2007)        |
| $\text{BrO} + \text{NO} \rightarrow \text{Br} + \text{NO}_2$                   | $8.7 \times 10^{-12} \exp(260/T)$                                                                                | (Atkinson et al., 2007)     |
| $\text{BrO} + \text{NO}_2 \rightarrow \text{BrONO}_2$                          | $k_0 = 5.2 \times 10^{-31} \exp(T/300)^{-3.2}$<br>$k_\infty = 6.9 \times 10^{-12} \exp(T/300)^{-2.9}, F_c = 0.6$ | (Bloss et al., 2010)        |
| $\text{BrONO}_2 \rightarrow \text{BrO} + \text{NO}_2$                          | $2.8 \times 10^{13} \exp(12360/T)$                                                                               | (Orlando and Tyndall, 1996) |

## Figures in supplementary material

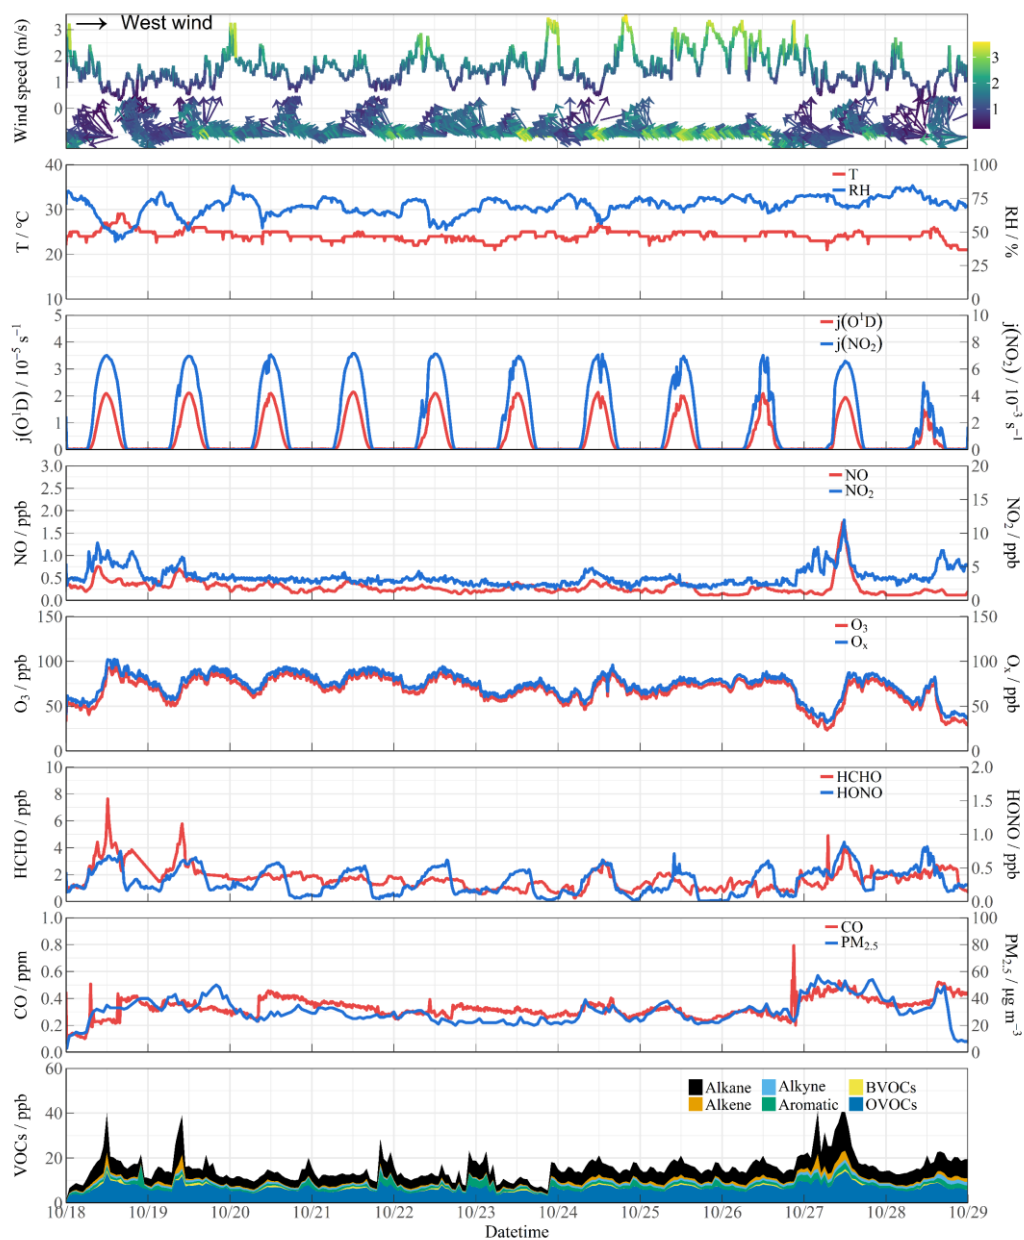

**Fig. S1.** Time series of observed meteorological and chemical parameters at YMK from 18 October to October 28, 2019. The GC-MS instrument failed between 24 and 26 October, and the missing VOCs data were replaced by the average value during the observation period. Only isoprene was considered in the BVOCs contribution.

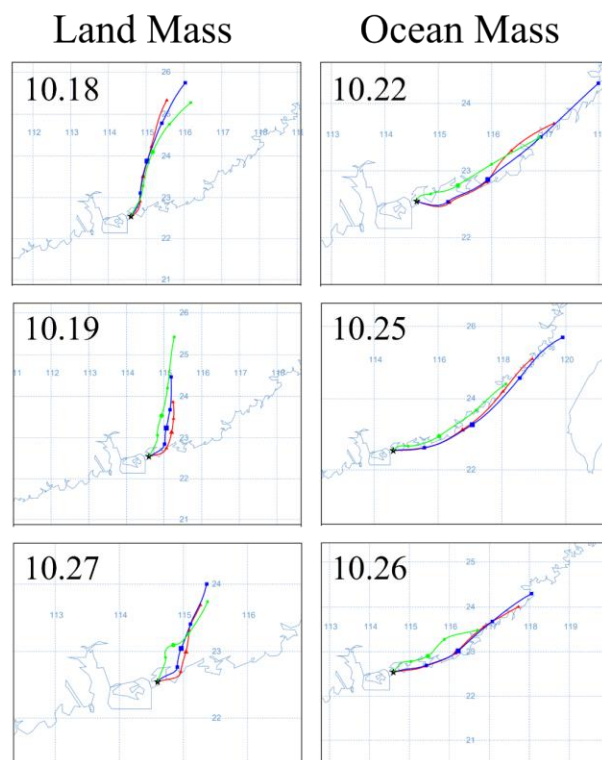

**Fig. S2.** The 24-h backward trajectories calculated at an arrival time of 12:00 (local time) at 100, 500, 1000 m above ground level at YMK in special days;

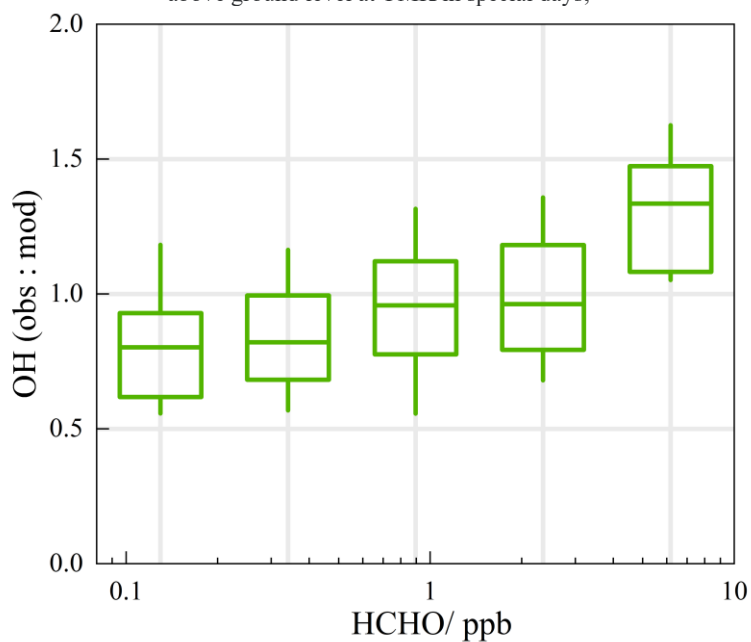

**Fig. S3.** The Obs-to-Mod ratio of OH radical as a function of HCHO in diurnal time. Daytime data are restricted according to  $j(\text{O}^1\text{D}) > 0.5 \times 10^{-5} \text{ s}^{-1}$ . Boxplot gives the minimum, 25%, median, 75%, and maximum of the data.
